## 1 **A Deep Learning Approach for Rapid Mutational Screening in Melanoma**

2 Randie H. Kim<sup>1,2†</sup>, Sofia Nomikou<sup>3†</sup>, Nicolas Coudray<sup>4,5</sup>, George Jour<sup>1,2,3</sup>, Zarmeena Dawood<sup>2</sup>,  
3 Runyu Hong<sup>6</sup>, Eduardo Esteva<sup>7</sup>, Theodore Sakellaropoulos<sup>3,8</sup>, Douglas Donnelly<sup>1</sup>, Una Moran<sup>2</sup>,  
4 Aristides Hatzimemos<sup>1</sup>, Jeffrey S. Weber<sup>2,8</sup>, Narges Razavian<sup>10,11</sup>, Ioannis Aifantis<sup>3,8</sup>, David Fenyo<sup>6,9</sup>,  
5 Matija Snuderl<sup>3</sup>, Richard Shapiro<sup>2,12</sup>, Russell S. Berman<sup>2,12</sup>, Iman Osman<sup>1,2\*</sup>, Aristotelis Tsirigos<sup>3,4\*</sup>

6  
7 <sup>1</sup>The Ronald O. Perelman Department of Dermatology

8 <sup>2</sup>Interdisciplinary Melanoma Cooperative Group

9 <sup>3</sup>Department of Pathology

10 <sup>4</sup>Applied Bioinformatics Laboratories

11 <sup>5</sup>Skirball Institute Department of Cell Biology

12 <sup>6</sup>Institute for Systems Genetics

13 <sup>7</sup>New York University Tandon School of Engineering

14 <sup>8</sup>Laura and Isaac Perlmutter Cancer Center

15 <sup>9</sup>Department of Biochemistry and Molecular Pharmacology

16 <sup>10</sup>Department of Radiology

17 <sup>11</sup>Department of Population Health

18 <sup>12</sup>Department of Surgery

19  
20 NYU Grossman School of Medicine, New York, New York.

21  
22 †These authors contributed equally to this work.

23  
24 \*Corresponding Authors:

25  
26 Aristotelis Tsirigos, PhD  
27 Associate Professor of Pathology  
28 Director, Applied Bioinformatics Laboratories  
29 NYU Grossman School of Medicine  
30 227 East 30<sup>th</sup> Street  
31 New York, New York  
32 Phone: 646-501-2693  
33 Email: [Aristotelis.Tsirigos@nyulangone.org](mailto:Aristotelis.Tsirigos@nyulangone.org)

34  
35 Iman Osman, MD  
36 Professor of Dermatology  
37 Associate Dean for Translational Research Support  
38 Director, Interdisciplinary Melanoma Cooperative Group  
39 NYU Grossman School of Medicine  
40 522 First Avenue  
41 Phone: 212-263-9075; Fax: 212-263-9090  
42 Email: [Iman.Osman@nyulangone.org](mailto:Iman.Osman@nyulangone.org)

43

44 **Abstract**

45 Image-based analysis as a rapid method for mutation detection can be advantageous in  
46 research or clinical settings when tumor tissue is limited or unavailable for direct testing. Here,  
47 we applied a deep convolutional neural network (CNN) to whole slide images of melanomas  
48 from 256 patients and developed a fully automated model that first selects for tumor-rich areas  
49 (Area Under the Curve AUC=0.96) then predicts for the presence of mutated *BRAF* in our test  
50 set (AUC=0.72) Model performance was cross-validated on melanoma images from The Cancer  
51 Genome Atlas (AUC=0.75). We confirm that the mutated *BRAF* genotype is linked to phenotypic  
52 alterations at the level of the nucleus through saliency mapping and pathomics analysis, which  
53 reveal that cells with mutated *BRAF* exhibit larger and rounder nuclei. Not only do these findings  
54 provide additional insights on how *BRAF* mutations affects tumor structural characteristics, deep  
55 learning-based analysis of histopathology images have the potential to be integrated into higher  
56 order models for understanding tumor biology, developing biomarkers, and predicting clinical  
57 outcomes.

## 58 Introduction

59 Mutations in the *BRAF* oncogene are found in 50-60% of all melanomas<sup>1</sup>. With the  
60 development of targeted therapies<sup>2, 3</sup>, determining the mutational status of *BRAF* has become  
61 an integral component for the management of Stage III/IV melanomas. Current methods for  
62 mutation detection include DNA molecular assays<sup>4</sup> and rapid screening tests, such as  
63 immunohistochemistry, real-time polymerase chain reaction (PCR) and automated platforms<sup>5, 6</sup>,  
64 <sup>7</sup>, all of which require tumor tissue for analysis. Recently, image-based analysis has been  
65 investigated as an alternative method for mutation prediction, which can be particularly useful in  
66 settings when tumor is either not available or inadequate for direct testing. While many of these  
67 studies involve the use of radiomics<sup>8</sup>, image-based analysis has expanded to histopathology  
68 with the advent of digitized whole slide images (WSI).

69  
70 The field of pathomics attempts to extract and quantitate features from high-resolution  
71 digitized WSI on a large scale for the purposes of integrating with molecular signatures,  
72 developing biomarkers, and predicting clinical or treatment outcomes<sup>9</sup>. These tasks include  
73 quantifying the number of objects, detecting object boundaries, classifying groups of objects,  
74 and labeling that allow for characterization of tissue not typically possible by traditional  
75 microscopic evaluation<sup>10</sup>. With the amount of data that can be potentially generated with  
76 pathomics, machine learning algorithms are uniquely positioned to link image features to a  
77 greater framework of understanding tumor biology<sup>11, 12</sup>.

78  
79 Relatedly, deep convolutional neural networks (CNN) have been shown to predict for the  
80 presence of actionable genetic mutations, such as *EGFR*, *ER*, and *BRAF* in a number of solid  
81 tumors using histopathological images<sup>13, 14, 15, 16</sup>, demonstrating that genotypic-phenotypic  
82 changes can be detected in tumor cells and/or the tumor microenvironment. In response to  
83 limitations that deep learning algorithms represent a “black box”, additional studies have

84 attempted to correlate learned histopathologic features with specific phenotypes<sup>17</sup>. Furthermore,  
85 better understanding of how various training parameters and modes of learning can influence  
86 model performance is required before broader applications to clinical practice.

87

88 In this study, we utilize two distinct and complementary methods of analyzing whole slide  
89 images for the prediction of mutated *BRAF* in melanomas resected from patients prospectively  
90 enrolled in a single-institution, IRB-approved clinicopathological biorepository. First, we apply  
91 deep learning techniques to histopathology images of FFPE primary melanomas in order to  
92 develop a model from tissue specimens that are more representative of what might be seen in  
93 routine clinical practice. Through saliency mapping, we determine that cell nuclei are a key  
94 feature in what our network learns for mutation prediction. Finally, we confirm that the mutated  
95 *BRAF* genotype is associated with detectable and quantifiable nuclear differences using  
96 pathomics analysis, thus providing a genotype-phenotype link in melanoma tumor cells. We  
97 present our deep learning models for predicting *BRAF* mutations in melanoma to demonstrate  
98 the feasibility and explainability of rapid image-based mutational screening that can be used in  
99 research or clinical-based settings in which limited tumor tissue is available for direct testing.

## 100 **Results**

### 101 *Dataset characteristics*

#### 102 *NYU cohort*

103 Formalin-fixed paraffin embedded (FFPE) hematoxylin and eosin (H&E)-stained slides of  
104 293 primary melanomas from 256 unique patients were included in this study. 103 melanomas  
105 harbored mutated *BRAF* and 190 melanomas were wild-type *BRAF*. All slides were digitized at  
106 20x magnification and reviewed for quality control. Images that were blurry, faded, or contained  
107 no tumor were excluded. Additionally, only the slide with the greatest tumor content was used to  
108 build the classifier in order to reduce bias, leading to a final data cohort of 256 H&E slides.  
109 Slides were divided into training (n=184), validation (n=36), and independent testing cohorts  
110 (n=36) without overlap between patient subsets. Within each cohort, *BRAF*-mutant and *BRAF*-  
111 wild type (*BRAF-WT*) melanomas were represented. V600E comprised 70% of the *BRAF*  
112 mutations.

113

#### 114 *The Cancer Genome Atlas (TCGA) cohort*

115 An image dataset of 68 digitized FFPE H&E-stained slides of primary melanomas<sup>18</sup> were  
116 retrieved from TCGA database<sup>19</sup> and used as a second independent cohort. Clinical information  
117 was not available for all slides. Because TCGA primary melanoma specimens are enriched for  
118 thicker tumors (median=2.7mm; mean=4.9mm<sup>18</sup>), we selected 28 specimens with Breslow depth  
119 similar to our cohort as a second independent cohort to maintain uniformity of Breslow depth in  
120 our analysis.

121

#### 122 *Automated selection of primary melanomas on whole slide histopathology images*

123 Our computational workflow is shown in **Figure 1A** and is the same across all our  
124 classifiers (see Methods). Because skin excisions often contain heterogeneous tissue, our first

125 task was to automate the identification of melanoma on whole slide images. Tumor-rich areas  
126 were manually annotated “in” the regions of interest (ROI) by a single dermatopathologist while  
127 normal skin, associated appendages, connective and subcutaneous tissue, necrosis,  
128 hemorrhage, and aggregates of dense inflammation were “out” of the ROI. For this task, we  
129 chose the Inception v3 architecture, which has been previously shown to accurately distinguish  
130 between tumor and non-tumor areas on H&E slides<sup>13</sup>. Learning curves are presented in **Figure**  
131 **1B left and middle**. Model performance achieved a per patient AUC=0.96 [95% CI: 0.90-0.99]  
132 and a per tile AUC=0.92 [95% CI: 0.918-0.921] (**Figure 1B right**). H&E-stained non-annotated  
133 whole slides of *BRAF*-mutant and *BRAF-WT* melanomas along with their corresponding  
134 network-generated probability heat maps and pathologist-annotated tumor masks are presented  
135 in **Figure 1C**. Notably, there is excellent concordance between the pathologist and the network.  
136 Training performed on images at 10x and 5x magnification resulted in similar network  
137 performances (**Supplemental Figure 1** and **Supplemental Table 1**). The networks generated  
138 by this analysis are hereafter referred to as “TumorNet” along with the corresponding  
139 magnification.

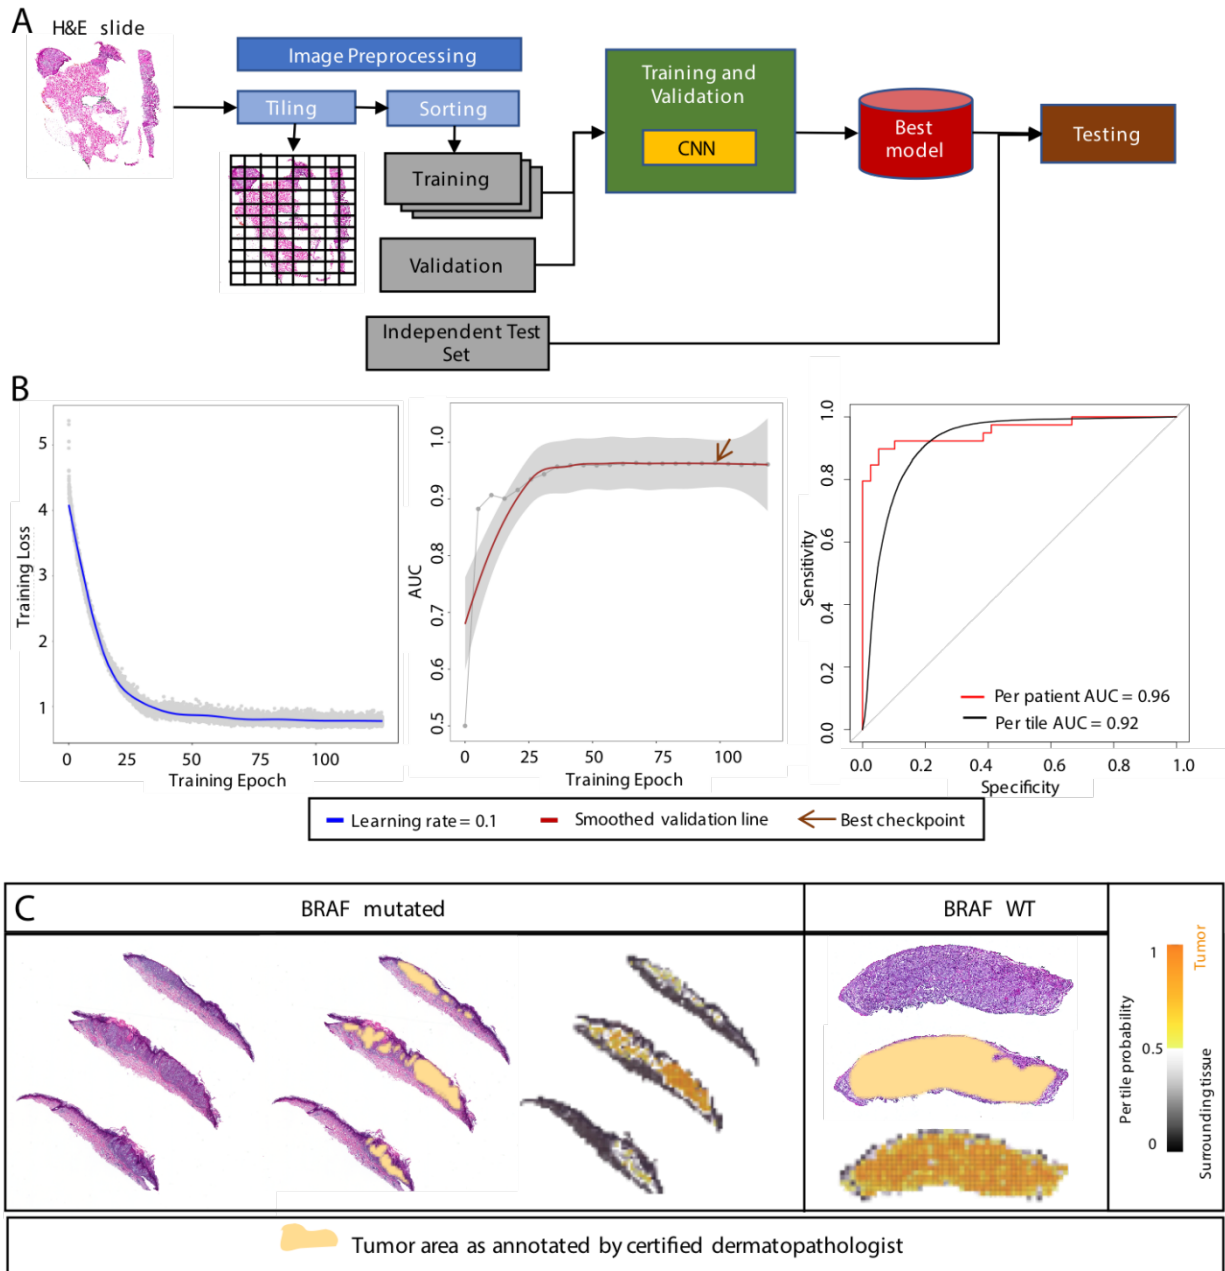

140  
141  
142  
143  
144  
145  
146  
147  
148  
149  
150  
151

**Figure 1. Automated tumor annotation.** **A.** Computational workflow for all our classifiers. To train the CNN architectures, slides are tiled to non-overlapping tiles and assigned to training, validation and independent sets comprising of 70%, 15% and 15% of the total number of tiles, respectively. After conversion to TF Record format, training is performed. The best performing model on the validation data is evaluated on the independent set. **B.** Training loss (left) of Inception v3 for tumor annotation. Validation AUC (middle) across training with best model chosen at 98 training epochs. ROC curves on test set per tile and per patient (right). **C.** Examples of a *BRAF* mutated and a *BRAF* WT slide for the tumor annotation classifier with corresponding tumor areas as annotated by certified dermatopathologist.

152 *BRAF* mutation prediction from melanoma whole-slide images by different CNN architectures

153 We first decided to explore the performance of three state-of-the-art CNN architectures  
154 in *BRAF* mutation prediction; Inception v3, VGG16<sup>20</sup> and ResNet18<sup>21</sup>. All three architectures  
155 were successfully trained from scratch on the same dataset split into training, validation and test  
156 sets (Panels a and b of **Figures 2A-C**). Performance on the independent test set was varied,  
157 with Inception v3 achieving an AUC=0.69 [95% CI:0.50-0.86] (**Figure 2A** panel c); VGG16  
158 achieving AUC=0.74 [95% CI:0.58-0.90] (**Figure 2B** panel c); and ResNet18 achieving  
159 AUC=0.86 [95% CI:0.74,0.99] (**Figure 2C** panel c). When applied to the TCGA dataset,  
160 Inception v3 generalized better (AUC=0.73 [95% CI:0.53-0.94] compared to AUC=0.59 [95%  
161 CI:0.37-0.82] and AUC=0.59 [95% CI:0.36-0.81] of VGG16 and ResNet18 respectively (Panel d  
162 of **Figures 2A-C** and **Supplemental Table 2**) (See Methods for details). Consequently, we  
163 chose Inception v3 as the most suitable architecture for our subsequent analyses.



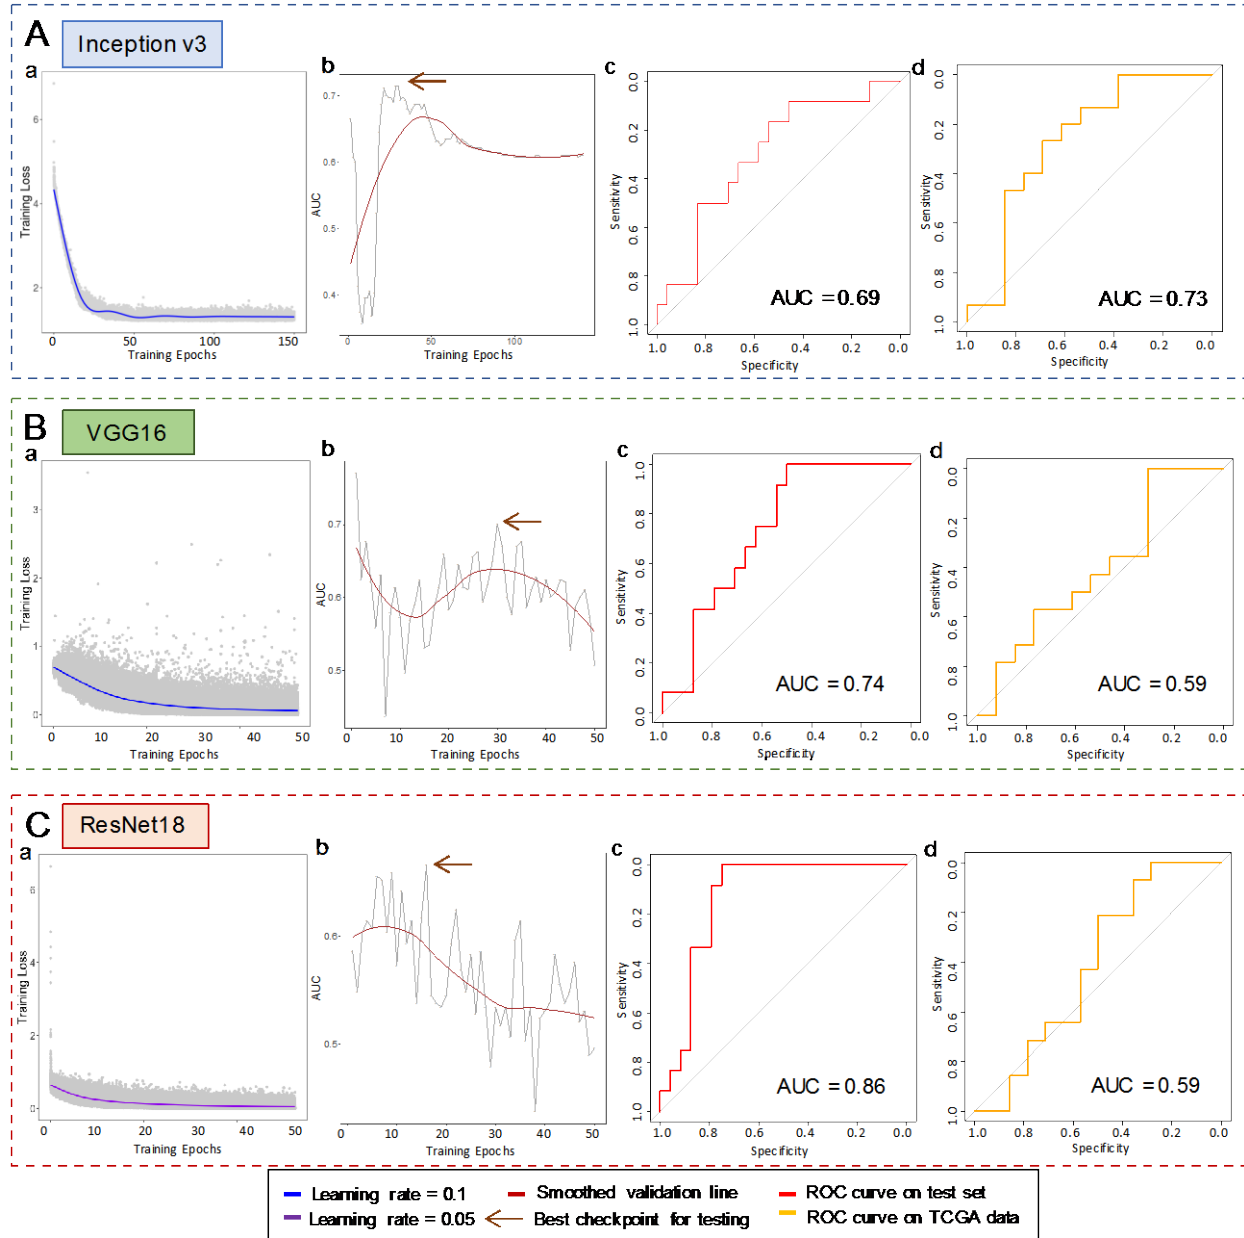

164  
165  
166  
167  
168  
169  
170  
171  
172  
173  
174  
175  
176  
177

**Figure 2. BRAF mutation prediction is feasible across multiple CNN architectures.** **A)** Inception v3 a) Training Loss of Inception v3 for BRAF mutation prediction. b) Validation AUC across training. Best checkpoint is chosen at 30 training epochs. c) ROC curve for independent test set on best checkpoint. AUC is 0.69. d) ROC curve for external TCGA cohort on best checkpoint. AUC is 0.73. **B)** VGG16 a) Training Loss of VGG16 for BRAF mutation prediction. b) Validation AUC across training. Best checkpoint is chosen at 30 training epochs. c) ROC curve for independent test set on best checkpoint. AUC is 0.74. d) ROC curve for external TCGA cohort on best checkpoint. AUC is 0.59. **C)** ResNet18 a) Training Loss of ResNet18 for BRAF mutation prediction. b) Validation AUC across training. Best checkpoint is chosen at 16 training epochs. c) ROC curve for independent test set on best checkpoint. AUC is 0.86. d) ROC curve for external TCGA cohort on best checkpoint. AUC is 0.59.

178 *Effect of training parameters on BRAF mutation prediction using Inception v3*

179 We next sought to elucidate the effect of tile size and training mode of Inception v3 on  
180 BRAF mutation prediction. Because Inception v3 only accepts tile sizes of 299x299 pixels, we  
181 used different magnifications as a proxy and retrained the architecture at 5x and 10x  
182 magnifications using the same data set split to training, validation and independent test sets.  
183 Additionally, we explored whether utilization of transfer learning to fine tune the last layer of the  
184 network influenced architecture performance compared to training all layers from scratch. For  
185 transfer training, we retrained the architecture using the weights of the ImageNet challenge<sup>22</sup> as  
186 well as the weights of the best checkpoints from our own melanoma annotation classifiers for  
187 each magnification (see Methods for details). The networks' performance on the independent  
188 test set and the TCGA cohort are shown in **Figure 3A** with additional details provided in  
189 **Supplemental Figures 2,3,4** and **Supplemental Table 3**. Training at 5x magnification yielded  
190 inconsistent results, with large variations in the AUC values. While training at 10x magnification  
191 performed more consistently across different training modes, training at 20x magnification  
192 demonstrated the least amount of variation, with the model trained with transfer training based  
193 on the weights from our TumorNet network achieving the best AUCs for the independent NYU  
194 test set (AUC = 0.72 [95% CI:0.53-0.87]) and the TCGA cohort (AUC = 0.75 [95% CI:0.57-0.94])  
195 (**Figure 3B**). Examples of *BRAF*-mutant and *BRAF*-WT H&E-stained slides from the  
196 independent test set and TCGA cohorts are shown in **Figure 3C** along with their probability heat  
197 maps.

198  
199 Lastly, we investigated the effect of dataset size on prediction AUC. We down-sampled  
200 the dataset to 20,40,60 and 80% of initial data (**Supplemental Table 4**). Transfer training of  
201 Inception v3 using the weights of TumorNet20x was repeated for each down-sampled data set.  
202 Average AUC on the validation and test sets was reduced, as expected (**Supplemental Figure**  
203 **5**). Fitting an inverse power law curve to the data demonstrated that in order for the classifier to

204 achieve an AUC of 0.8, ~4.5x more data (i.e., at least 800 slides) would be needed. For the  
205 classifier to predict BRAF mutation with an AUC of 0.90, 10x more data (i.e. at least 1800  
206 slides) would be needed.

207

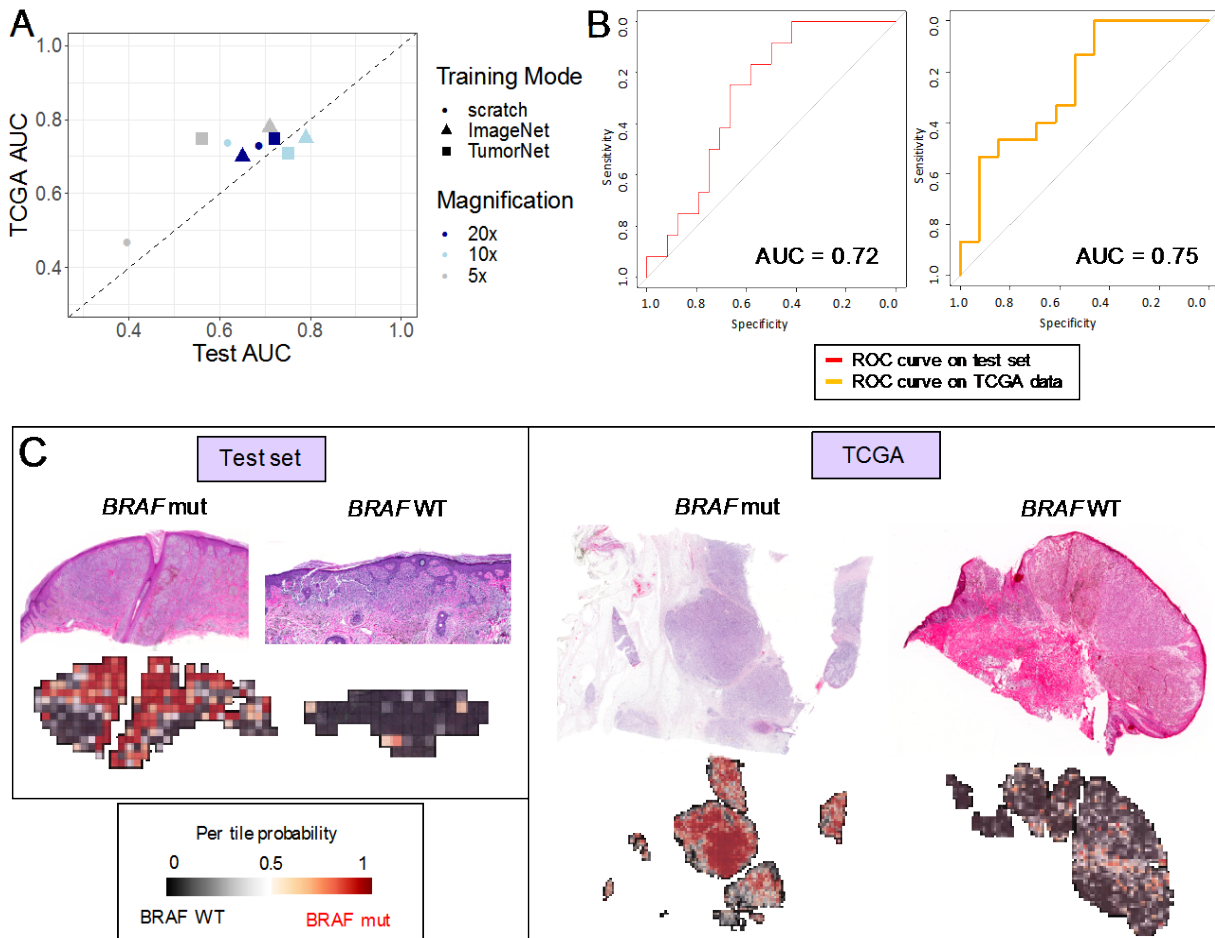

208

209

210

211 **Figure 3. Exploration of the effect of magnification and learning mode on BRAF mutation**

212 **prediction using Inception v3. A.** Parameter exploration for magnification and training modes for

213 Inception v3. The AUC on the independent test set and the external TCGA cohort are used as measures

214 for prediction performance. Training at 5x seems unstable across different training modes (grey points).

215 Training at 10x (light blue) and 20x (dark blue) yield more consistent results for different training

216 approaches with 20x producing results with the smallest variation. Transfer training at 20x using the pre-

217 trained tumor annotation network will be used onwards as our best classifier. **B.** ROC curve on

218 independent test set for best performing checkpoint for classifier trained on tumor annotation network at

219 20x magnification. AUC is calculated at 0.72 CI[0.53-0.87] (left). ROC for external TCGA cohort with AUC

220 at 0.75 CI[0.57-0.94]. **C.** Example mutation heat maps for BRAF mutated and BRAF WT slide from the

221 test set (left) and the TCGA cohort (right). Tiles are colored based on their BRAF mutation probability

222 values as predicted by the network.

223

224 *Automated sequential workflow for melanoma selection and mutation prediction*

225 In order to improve utilization of our deep learning models, we developed a fully  
226 automated workflow by combining our tumor annotation and *BRAF* mutation prediction  
227 classifiers (**Figure 4**). For this task, we first verified that the *BRAF* mutation classifier trained on  
228 automatically annotated tumor areas performed similarly to the one trained on the manually  
229 annotated tumors. All 256 whole slide images (WSI) at 20x magnification were passed through  
230 the trained tumor annotation network (TumorNet). Tiles assigned with a probability of containing  
231 tumor higher than the threshold set were filtered and split into training, validation, and  
232 independent test sets. The Inception v3 architecture was re-trained on tiles selected by the  
233 automated network for mutation prediction. The network trained on tiles selected by TumorNet  
234 achieved similar performance to the one trained on the manually selected regions  
235 (**Supplemental Figure 6**), demonstrating a successful fully automated sequential model.

236  
237

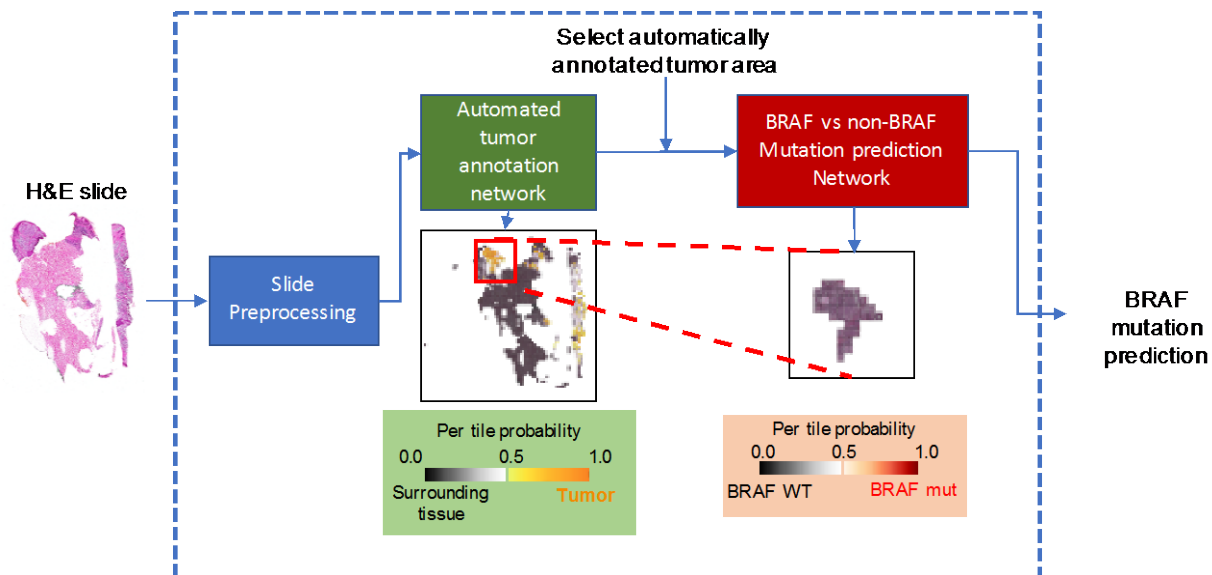

238  
239  
240  
241  
242  
243  
244  
245  
246

**Figure 4. Sequential workflow for *BRAF* mutation prediction.** Non-annotated whole slides are processed, tiled, and passed through the automated tumor annotation network which assigns a probability to each tile of belonging in the tumor. Tiles with high probability of containing tumor are subsequently passed through the mutation prediction network for determining the mutational status of the slide of interest.

247 *Association of network mutation localization with immunohistochemical analysis*

248 To further corroborate network accuracy, we examined whether network-generated  
249 probability heat maps are true visual representations of mutation localization. An additional set  
250 of 17 *BRAF*<sup>V600E</sup> cases underwent automated algorithmic mutation prediction and  
251 immunohistochemical (IHC) analysis with the monoclonal VE1 antibody, a reliable screening  
252 tool for detecting the specific V600E mutation<sup>23</sup>. A single dermatopathologist blinded to  
253 mutational status manually annotated tumor ROI on H&E-stained slides as well as regions of  
254 positive staining on both the H&E-stained and IHC slides. (**Figure 5A**). The annotated mask of  
255 positive IHC staining and the mask for the annotated tumor area from the H&E slide were then  
256 overlaid on the network-generated probability heat map. The average probability of tiles falling  
257 inside vs. outside the selected antibody stained mask was calculated and is displayed in the  
258 form of box plots in **Figure 5B** for all 17 slides. From the 7 slides that were correctly predicted  
259 as BRAF mutant by the network, five of them show statistically significant higher BRAF  
260 probabilities for the tiles inside the annotated V600E antibody stained area compared to the  
261 remaining tumor tiles, indicating that the network indeed localizes mutated *BRAF*.

262

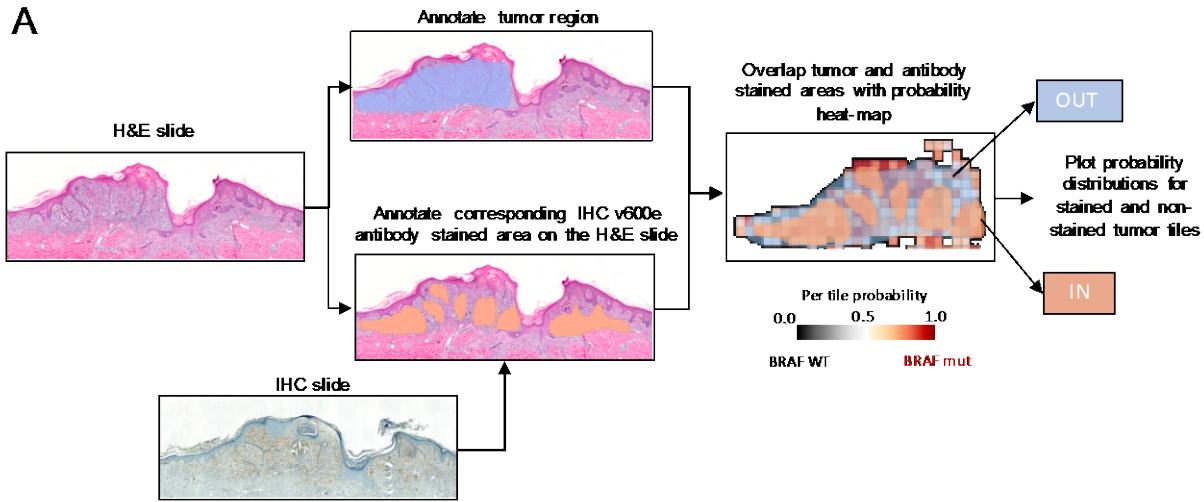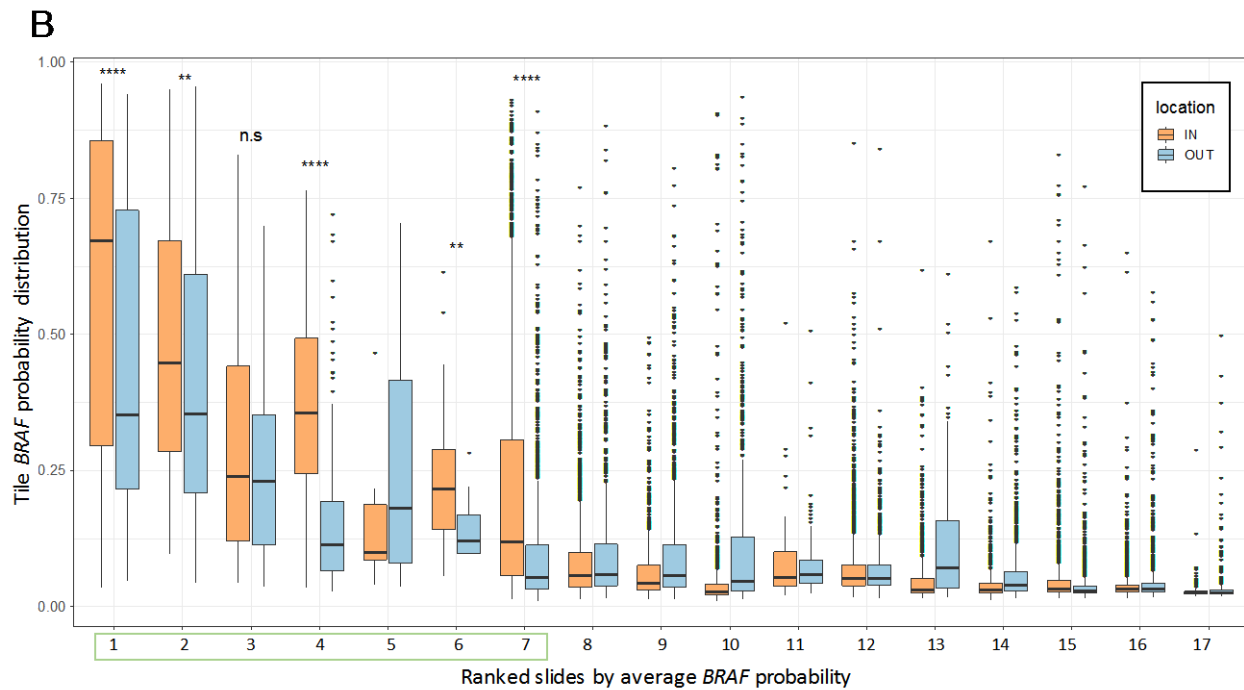

263  
 264 **Figure 5. BRAF V600E-predicted tumor areas overlap with immunohistochemical V600E antibody**  
 265 **staining for correctly predicted slides. A)** Overlap strategy for IHC and H&E slides. Tumor annotation  
 266 was performed on the H&E slides. Using the corresponding stained IHC slide for V600E, a single  
 267 pathologist performed annotation of the respective area on the H&E slide to avoid potential  
 268 inconsistencies due to the use of different slides to perform H&E and IHC if a different overlap approach  
 269 was utilized. Then, the masks for the annotated areas are overlapped with the tile BRAF mutation  
 270 probability heat-map to perform the overlap analysis. **B)** Probability distributions for 17 BRAF V600E  
 271 slides for tiles inside and outside of the V600E stained areas. From the seven slides correctly predicted  
 272 as BRAF V600E (green box), five of them show statistically significant higher BRAF probabilities for the  
 273 tiles inside the annotated V600E antibody stained area compared to the remaining tumor tiles.

274  
 275

276 *Cell nuclei are informative areas for BRAF mutation prediction*

277           We next attempted to delineate some of the learned image features that contribute to  
278 *BRAF* mutation prediction by the CNN. Tiles from the NYU independent test set were ranked by  
279 *BRAF* mutation probability. The top 100 and bottom 100 tiles were then used to create saliency  
280 maps using our best performing network (Inception v3 trained at 20x on the pre-trained tumor  
281 annotation weights). Saliency maps are generated using the weights of the last layer of the  
282 network before the fully connected layer. The map visualizes the importance of each image  
283 pixel for the prediction (see Methods for implementation details). **Figure 6A** demonstrates  
284 examples from high confidence and low confidence tiles from six different patients, in which the  
285 H&E tile containing tumor is shown on the left, the saliency map is shown in the middle, and the  
286 overlap of the two is shown on the right. In the saliency map, pixels assigned colors in the  
287 “warm” spectrum are considered important for mutation prediction while pixels assigned “cool”  
288 colors contribute less to the prediction. In both the high and low *BRAF*-mutant probability tiles,  
289 pixels with the highest contribution to the network performance are those corresponding to cell  
290 nuclei. The same analysis was repeated on tiles from the TCGA slides (**Figure 6B**) and again  
291 demonstrate that areas corresponding to cell nuclei seem to be the most important structures  
292 for the network’s prediction.

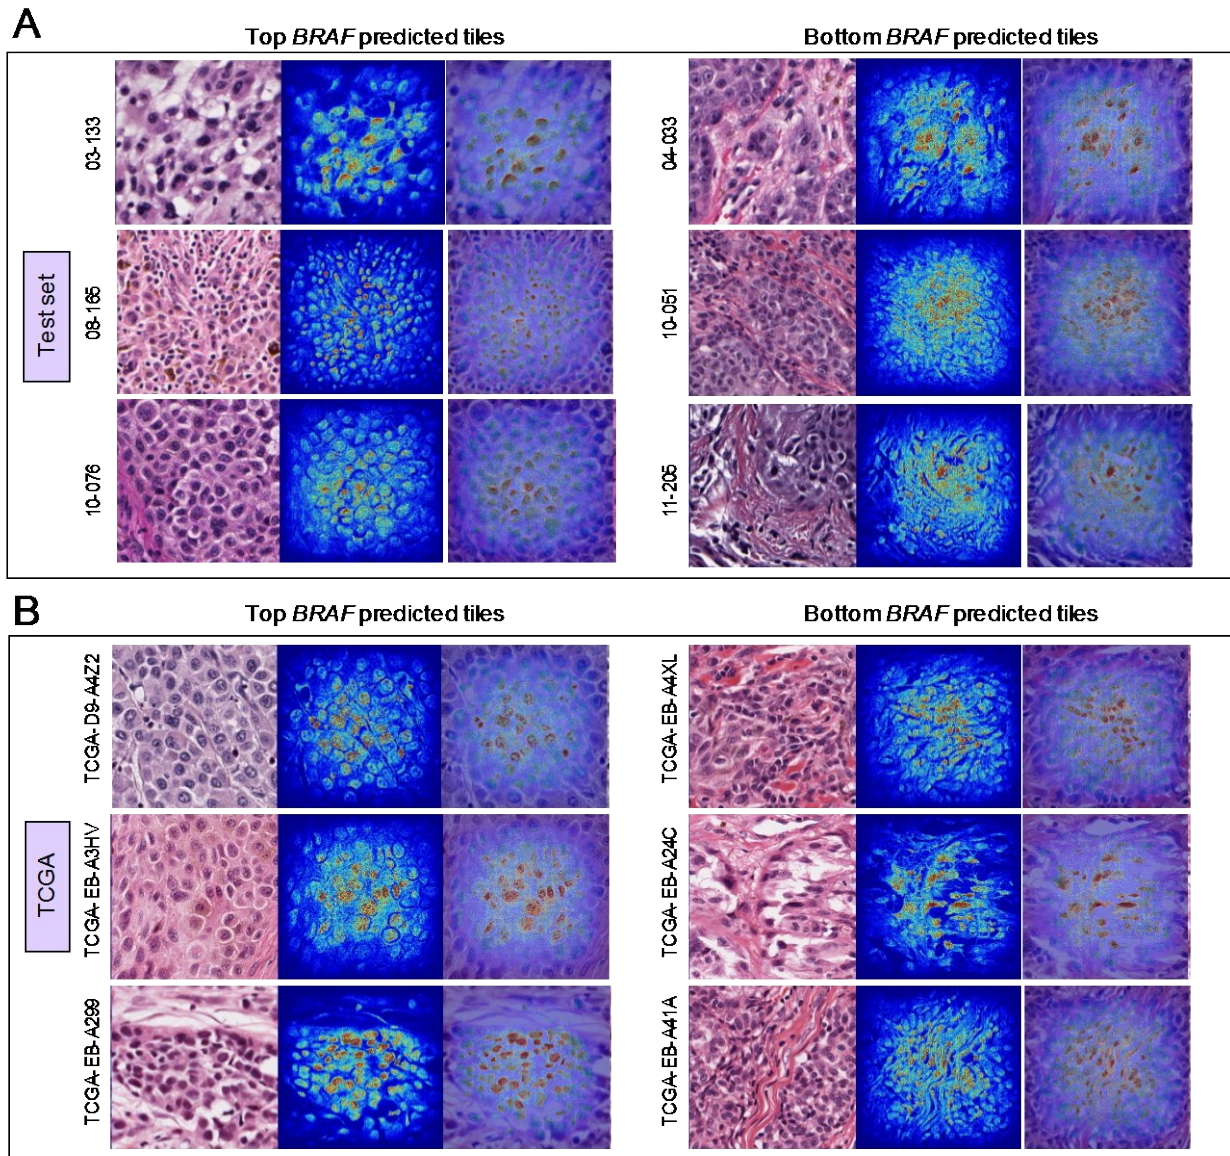

293  
294 **Figure 6. Saliency maps reveal cell nuclei as informative areas for *BRAF* mutation prediction. A)**  
295 Saliency maps for three tiles predicted with highest *BRAF* probability (left) and three tiles predicted with  
296 the lowest *BRAF* probability (right) from six different patients in the independent NYU test set. **B)** Saliency  
297 maps for three tiles predicted with highest *BRAF* probability (left) and three tiles predicted with the lowest  
298 *BRAF* probability (right) from six different patients in the TCGA data set. It can be observed that for all  
299 tiles independently of the *BRAF* probability, the network considers cell nuclei to be the most informative  
300 structures for the prediction.  
301



302 *Pathomics analysis reveals nuclear differences correlate to BRAF mutational status*

303 To explore the feasibility of *BRAF* mutation prediction using traditional image analysis  
304 approaches we developed a Pathomics pipeline using CellProfiler, a publicly available software  
305 offering multiple functionalities for traditional image processing such as automated annotation of  
306 image structures<sup>24</sup>, to detect nuclei of tumor melanocytes (**Figure 7A**). Our pipeline focuses on  
307 annotating cells and nuclei from the H&E slide (see Methods for details). Our first task was to  
308 unmix colors that are present in H&E-stained slides, where hematoxylin stains nuclei blue-black  
309 and eosin stains proteins in the cytoplasm and connective tissue elements pink. Additionally,  
310 melanin pigment appears as brown granules. These color signals were deconvoluted to  
311 generate grayscale images that indicate the location of each stain with a white color. Because  
312 cells with high melanin content may represent melanophages rather than tumor melanocytes,  
313 the pigment channel was overlaid with the hematoxylin channel to identify highly pigmented  
314 cells. These cells were then removed from subsequent analysis (**Figure 7A**). Objects that  
315 passed criteria were measured and assessed for 18 features (**Supplemental Figure 7, 8, 9 and**  
316 **10**).

317  
318 All 293 slides from our patient cohort were passed through the pipeline, which runs for  
319 each tile of a slide. The data were averaged across all identified nuclei and normalized by the  
320 total number of tiles by patient, when necessary. The analysis was performed on both tumor  
321 and non-tumor tiles of each slide. In non-tumor areas, there were no statistically significant  
322 differences in nuclear features across all melanomas (**Supplemental Figure 7**). In contrast,  
323 within tumor areas, differences in some nuclear features were detected between *BRAF*-mutated  
324 and *BRAF*-WT tumor tiles (**Figure 7B** and **Supplemental Figure 7**). These features included:  
325 (1) average nuclear area, (2) average nuclear eccentricity, (3) average minor axis, (4) average  
326 maximum, (5) median and (6) mean nuclear radius.

327

328           Compared to *BRAF*-WT nuclei, nuclei harboring mutated *BRAF* exhibited a larger  
329 average nuclear area with longer maximum, median, and mean nuclear radius, indicating that  
330 these nuclei are larger. Furthermore, *BRAF*-mutated nuclei demonstrated a longer minor axis  
331 and a smaller average nuclear eccentricity, indicating that the shape of the nucleus is rounder.  
332 The analysis was repeated on 64 available TCGA FFPE samples (**Supplemental Figure 8**) and  
333 demonstrated similar trends in nuclear features, although the differences did not reach statistical  
334 significance due to the small sample size. We also modified the pipeline to annotate and  
335 analyze cells instead of nuclei for both the NYU and the TCGA cohort (see Methods). No  
336 cellular features showed statistically significant differences across *BRAF* mutant and *BRAF* WT  
337 patients for the non-tumor tiles. In tumor tiles, the average cellular area, minor cell axis length  
338 and the maximum, median and mean cellular radii were larger in *BRAF*-mutant compared to  
339 *BRAF*-WT tumor nuclei for the NYU cohort. No significant differences were observed between  
340 *BRAF*-mutant and *BRAF*-WT tumor cells in TCGA data (**Supplemental Figures 9 and 10**).

341  
342           Finally, we decided to explore if conventional pathomics image analysis can predict the  
343 *BRAF* mutation as well as our deep learning network. We trained a random forest model and a  
344 generalized linear model using 7-fold cross validation to mimic the number of ~37 slides in the  
345 independent test set that we have for our network. We used all our 293 slides and the 18  
346 nuclear features provided by CellProfiler (**Supplemental Table 5** and Methods). The random  
347 forest model achieves an average AUC of 0.58 on the test set and 0.61 on the TCGA dataset.  
348 The generalized linear model yields an AUC of 0.56 on the test set and 0.58 on the TCGA data.  
349 Thus, deep learning was consequently better at predicting *BRAF* mutational status from H&E  
350 slides than conventional pathomics, an observation that has also been reported in radiomics  
351 studies<sup>8</sup>.

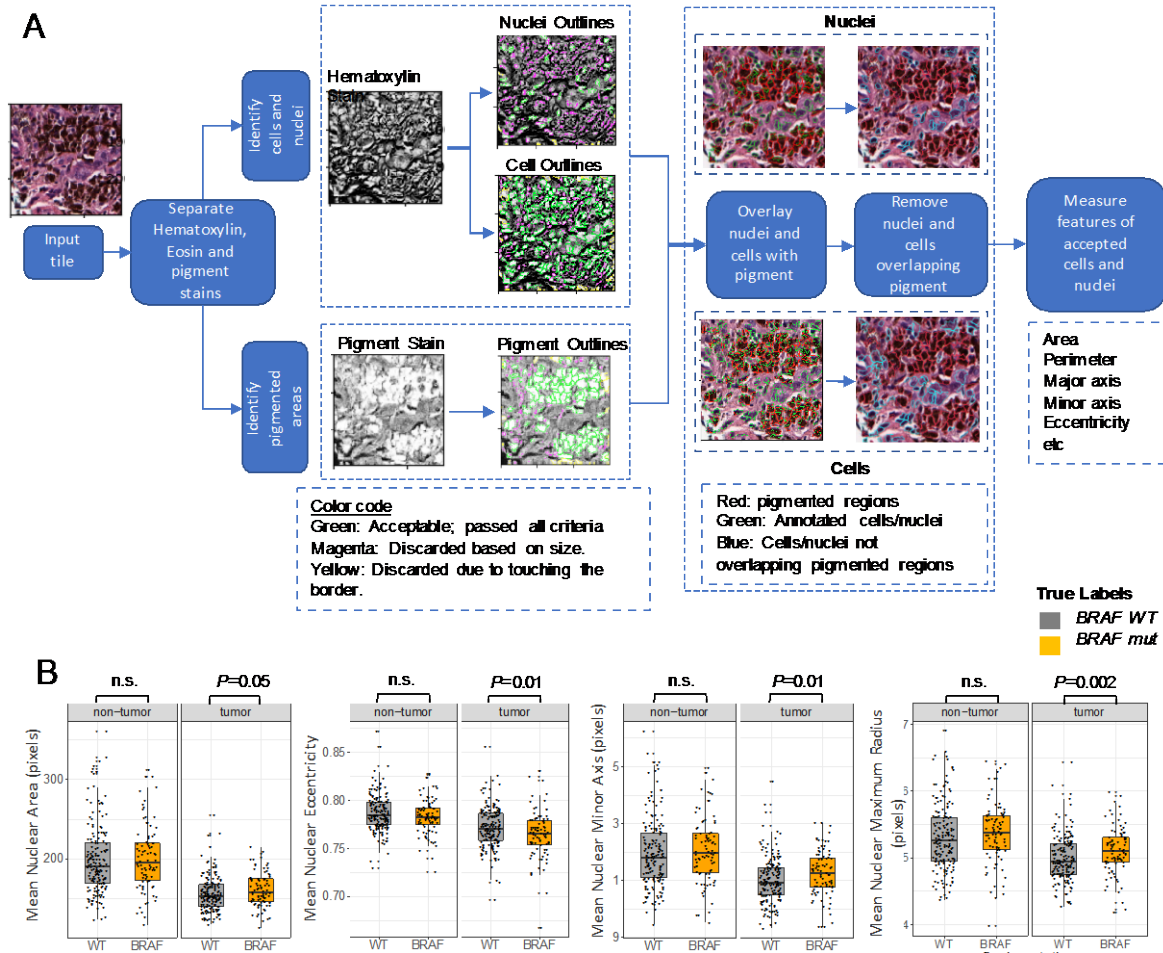

352  
353  
354  
355  
356  
357  
358  
359  
360  
361  
362  
363  
364  
365

**Figure 7. Pathomics analysis reveals that nuclear differences correlate to BRAF mutational status.**

**A)** Pathomics workflow with cellProfiler software. First, the hematoxylin, eosin and pigment stains are deconvolved. Hematoxylin is then used to annotate cells and cell nuclei. The pigment channel is used to annotate pigmented areas. Annotated nuclei and cells are overlapped with the pigmented regions and those overlapping the pigment are not considered for analysis. A variety of metrics for the size and shape of annotated nuclei are calculated and collected. **B)** Nuclear features for non-tumor and tumor nuclei aggregated per patient are plotted (for full list of features see Supplemental Figures 7,8,9 and 10). For non-tumor tiles, there are no differences between *BRAF* mutated and *BRAF* WT nuclei. For tumor tiles, *BRAF* mutated nuclei seem to have larger nuclear area, maximum radius and minor axis and lower eccentricity values. These results indicate bigger and rounder *BRAF* mutated nuclei compared to *BRAF* WT ones.

## 366 Discussion

367

368 In the era of personalized medicine, molecular profiling can guide optimal cancer  
369 treatment, particularly if targeted therapies, such as *BRAF* inhibitors, are available. Predicting  
370 *BRAF* mutational status from image-based analysis is being investigated as an appealing  
371 method for rapid screening without the need for tumor tissue, and has been previously  
372 demonstrated in radiomics using ultrasound images for papillary thyroid cancer<sup>25, 26</sup> and brain  
373 MRI images of metastatic melanomas<sup>27</sup>. More recently, deep CNN algorithms have been  
374 applied to histopathology images obtained from TCGA to predict for actionable mutations in lung  
375 adenocarcinoma<sup>13</sup>, papillary thyroid cancers<sup>15</sup>, and colorectal cancers<sup>16</sup>, indicating that  
376 genotypic alterations lead to phenotypic changes on the tumor cell level. In our study, we  
377 corroborate that *BRAF* mutations lead to specific morphologic changes, specifically larger and  
378 rounder nuclei, that can be predicted through deep learning and pathomics.

379

380 In melanoma, image-based analysis using deep learning has successfully been applied  
381 to classify pigmented lesions as benign vs. malignant using clinical<sup>28</sup> or dermoscopic<sup>29</sup> images  
382 with impressive accuracy. With respect to *BRAF* mutations, specific morphologic signatures  
383 associated with mutated *BRAF* in melanoma have been described independently with  
384 dermoscopy<sup>30</sup>, reflectance confocal microscopy<sup>31</sup>, and histology<sup>32, 33</sup>. These histologic features  
385 were determined by traditional microscopy and include greater pagetoid scatter, intraepidermal  
386 nesting, epidermal thickening, better circumscription, larger epithelioid and more pigmented  
387 melanocytes, and less solar elastosis. However, attempts to develop binary decision trees to  
388 predict for the *BRAF* mutation using histology alone achieved a predictive accuracy of only  
389 60.3%<sup>33</sup>.

390

391 A pan-cancer deep learning image analysis by Kather et al.<sup>16</sup> of FFPE H&E-stained  
392 slides of 14 different solid tumors and more than 5,000 patients from the TCGA database,

393 successfully predicted for mutated *BRAF* in colorectal cancers. Interestingly, no significant  
394 mutations were able to be predicted from primary melanomas, and only *FBXW7* and *PIK3CA*  
395 from metastatic melanoma samples. One potential reason that mutation prediction was less  
396 successful in melanoma samples from TCGA data is the relatively small sample size. Here, we  
397 use a dataset of melanomas from over 250 patients to train our architecture, with our best  
398 model achieving an AUC=0.72. Importantly, we were able to cross-validate our model on  
399 images from TCGA [AUC=0.75]. We further substantiate the accuracy of our model by utilizing  
400 IHC analysis with the monoclonal VE1 antibody and assessing the overlay between positive IHC  
401 staining of BRAF<sup>V600E</sup> on tissue sections and network-generated probability heat maps. Of the  
402 concordant cases between IHC and the network, 70% demonstrate significant overlap between  
403 the positive IHC staining and the heat map.

404

405         Despite the potential applications of unsupervised machine learning in pathology, a  
406 common concern is the "black box" issue in which learned features cannot be discovered from  
407 outputs. Relevant features can be inferred by examining high confidence image tiles for  
408 common morphological features. In the study by Kather et al.<sup>16</sup>, tiles of colorectal cancers  
409 ranked highly for mutated *BRAF* demonstrated areas of mucin as well as poorly differentiated  
410 tumor. A different computational approach by Fu et al.<sup>17</sup> trained on 17,355 H&E-stained fresh-  
411 frozen tissue spanning 28 tumor types from TCGA to extract 1,536 image features and then  
412 used transfer learning to build prediction models for genotypes of interest. One high performing  
413 model was the association of mutated *BRAF* in papillary thyroid cancers, in which *BRAF*  
414 mutations are said to be found in 50%. The authors raise the question of whether the mutated  
415 *BRAF* genotype leads to the histological phenotype or whether *BRAF* mutations preferentially  
416 occur in certain cell types. We would argue the case for the latter, as *BRAF* mutations are also  
417 found in up to 50% of melanomas, but cannot be reliably predicted based on World Health

418 Organization (WHO) histologic subtypes: superficial spreading melanoma, nodular melanoma,  
419 lentigo maligna melanoma, and acral lentiginous melanoma<sup>32</sup>.

420  
421 Consequently, morphologic alterations associated with mutated *BRAF* are likely too  
422 subtle to be detected through traditional microscopy. Saliency maps or explainability techniques  
423 alter individual pixels and capture its effects on model performance<sup>34</sup>. In our study, we  
424 developed a novel pipeline that generates saliency maps for our network mutation prediction  
425 model and identified pixels corresponding to cellular nuclei as important for network decision-  
426 making (**Figure 6**) in both our institutional cohort as well as the TCGA cohort. We further  
427 investigate whether there are nuclear features that are associated with *BRAF* mutational status  
428 using pathomics to extract and quantitate 18 features using CellProfiler software<sup>24</sup>. Nuclei  
429 harboring mutated *BRAF* were larger and rounder than wild-type *BRAF* nuclei as measured by  
430 area, radii, and eccentricity. Notably, this corroborates previous studies that described *BRAF*-  
431 mutated melanomas as featuring larger and epithelioid melanocytes<sup>32, 33</sup>.

432  
433 Because WSI analysis is a crucial feature for clinical adaptability, we also built a fully  
434 automated model that first applies a tumor selection algorithm (TumorNet) on non-annotated  
435 images followed by the mutation prediction algorithm. With the recent FDA approval of the first  
436 WSI imaging system for primary diagnosis in pathology<sup>35</sup>, the digitization of slides seems poised  
437 to be integrated into routine clinical practice. For instance, feature extraction from WSI analysis  
438 integrated with clinicopathologic data, mutational status, and gene expression data led to an  
439 improved prognostic model for recurrence-free survival in melanomas from TCGA<sup>36</sup>, while  
440 pathomics combined with transcriptomics analysis of CD8(+) T-cell distribution in metastatic  
441 melanomas can potentially predict clinical responses to BRAF-inhibitor therapy<sup>37</sup>. Other  
442 approaches have combined radiomics with pathomics to localize high-grade prostate cancers<sup>38</sup>  
443 or predict for outcomes such as recurrence-free survival in lung cancer patients<sup>39</sup>.

444

445           Similarly, while deep learning-based mutational predictions are unlikely to replace direct  
446 molecular testing on tissue in the immediate future, there is great promise for these  
447 computational approaches to be integrated into higher order models, such as predicting for  
448 treatment responders vs. non-responders or survival outcomes, as has been previously  
449 demonstrated in lung cancers<sup>40</sup> and gliomas<sup>41</sup>. We present a fully automated deep CNN model  
450 that accurately differentiates melanomas from benign tissue and uses morphologic features to  
451 predict the presence of the *BRAF* driver mutations on two independent cohorts. We confirm that  
452 the mutated *BRAF* genotype is linked to phenotypic alterations at the level of the nucleus  
453 through saliency mapping and pathomics analysis, providing additional insights on how this  
454 mutation affects tumor structural characteristics. Compared to direct testing methods, such an  
455 image-based approach has the potential to provide mutational data in a rapid, cost-reducing,  
456 and tissue-sparing manner that can be scaled up in research or even possibly, clinical settings.

457

## 458 **Materials and Methods**

### 459 *Dataset of whole-slide images*

460           All patients were enrolled in an IRB-approved clinicopathological database and  
461 biorepository in the Interdisciplinary Melanoma Cooperative Group (IMCG) at NYU Langone  
462 Health. The IMCG collects prospective clinical, pathological, and follow-up data from melanoma  
463 patients who present for diagnosis and/or treatment<sup>42</sup>.

464           365 H&E-stained FFPE whole-slides from 324 primary melanomas diagnosed between  
465 1994 to 2013 were retrieved and digitized at 20x magnification. A single board-certified  
466 dermatopathologist (RHK) reviewed all digitized slides for image quality and excluded images  
467 that were blurry, faded, or did not contain any tumor. 293 images from 256 melanomas were

468 subsequently annotated by RHK for tumor-rich regions of interest (ROIs) using Aperio  
469 ImageScope software. Driver mutations were previously determined by Sanger sequencing.

470

#### 471 *Dataset from The Cancer Genome Atlas*

472 68 FFPE slides of primary melanomas from 66 patients from the TCGA were  
473 downloaded and tiled into non-overlapping tiles of 299x299 pixels. Clinical information was not  
474 available for all slides. 28 slides with a Breslow depth similar to our cohort were maintained a  
475 second independent cohort. All tiles were sorted for testing and TFRecord files were generated.  
476 The slides were passed through the mutation prediction networks and the average probabilities  
477 per slide were used for the AUC calculation. The TCGA cohort was used as a generalizability  
478 metric for our classifiers. 64 slides were used for the pathomics analysis. The 4 slides excluded  
479 were very large and generated a very high number of tiles making the processing time for  
480 CellProfiler prohibitive.

481

#### 482 *Software availability*

483 We utilized the adapted Tensorflow DeepPATH pipeline  
484 (<https://github.com/ncoudray/DeepPATH.git>) to perform our analysis using the Inception v3 CNN  
485 architecture. To train the vgg16 and resnet18 architectures we used the PathCNN pipeline  
486 published on github (<https://github.com/sedab/PathCNN>). Our CellProfiler analysis pipeline is  
487 also available on github ([https://github.com/sofnom/HistoPathNCA\\_pipeline](https://github.com/sofnom/HistoPathNCA_pipeline)).

488

#### 489 *Image pre-processing*

#### 490 *BRAF mutation prediction*

491 To avoid introducing potential bias in our BRAF mutation classifiers, only the slide with  
492 the highest tumor content was used per patient, resulting in a dataset of 256 slides. WSI were  
493 partitioned at 20x magnification into non-overlapping 299x299 pixel tiles. For these classifiers,



494 only the tiles from the area annotated as tumor were included in the analysis. This process  
495 generated 222,561 total tiles in our dataset, after removing tiles with more than 50%  
496 background (white area of slides). All tiles take the label of the slide they belong to and are  
497 sorted in training, validation and independent sets comprising of 70%, 15% and 15% of the total  
498 number of tiles correspondingly. All tiles from a specific slide are included in the same set with  
499 no overlap allowed. Tile sorting was performed using sorting option number 14 from the  
500 DeepPATH pipeline. Tiles in the train and validation sets were then converted to TF record  
501 format, which is necessary for training of Inception v3, in groups of 1024 tiles in each TF record  
502 file for the training set and 128 tiles for the validation set.

503

#### 504 *Tumor annotation network*

505 All 293 whole-slide images were tiled for this task in order to provide the maximum  
506 amount of data available for training, similar to a data augmentation technique. The slides were  
507 tiled separately for the areas annotated as “tumor” and “non-tumor”. The number of tiles is  
508 presented in **Supplemental Table 1**, for all three magnifications explored. Tile sorting was  
509 performed using sorting option 19 from the DeepPATH pipeline. Tiles in the train and validation  
510 sets were converted as before to TF record format in groups of 1024 tiles in each TF record file  
511 for the training set and 128 tiles for the validation set.

512

#### 513 *Deep learning with Convolutional Neural Networks for BRAF mutation prediction*

##### 514 *Inception v3*

515 The Inception v3 architecture is a Convolutional Neural Network (CNN) that utilizes  
516 modules comprised of various convolutions with different kernel sizes and a max pooling layers.  
517 The network was trained on 70% of the tiles from each data set, with 15% of the tiles used for  
518 validation and 15% used for independent testing.

519 The network was trained from scratch and using transfer learning for 150,000 training  
520 steps on batches of 160 images, on 4 GPUs. The corresponding number of epochs varies  
521 based on the total number of tiles and the batch size and is determined by the following  
522 equation:

$$\# \text{ training steps per epoch} = \frac{\text{total number of tiles}}{\text{batch size}}$$

523  
524 The learning rate was set to 0.1. For transfer learning, the initial learning rate was set  
525 to 0.001. The RMSProp for gradient descent optimizer was used with learning rate decay factor  
526 of 0.16 and 15 epochs per decay for both training modes. The activation function used in the  
527 output layer was softmax. The built-in data augmentation techniques of Inception v3 were  
528 utilized as defined in the “image\_processing.py” script available here  
529 [https://github.com/ncoudray/DeepPATH/tree/master/DeepPATH\\_code/01\\_training/xClasses/inc](https://github.com/ncoudray/DeepPATH/tree/master/DeepPATH_code/01_training/xClasses/inception)  
530 [eption](https://github.com/ncoudray/DeepPATH/tree/master/DeepPATH_code/01_training/xClasses/inception). These include horizontal flip of the images and random color distortion, as well as  
531 obtaining randomly sized crops of the training images and resizing them to the necessary tile  
532 size.

533 For transfer training using ImageNet weights we used the checkpoint at the following  
534 link: <http://download.tensorflow.org/models/image/imagenet/inception-v3-2016-03-01.tar.gz>. For  
535 transfer training using the weights from the corresponding tumor annotation classifier we used  
536 the best checkpoints of the tumor classification networks.

537 The network’s performance was monitored based on the AUC on the validation set. The  
538 best performing model was chosen either when the validation AUC displayed a very sharp drop  
539 between the training steps or when there was a clear plateau. The performance of the best  
540 model was then evaluated on the independent set and the AUC was calculated. The network  
541 outputs a probability value for every tile for each class of interest. The tile is assigned to the

542 class with the highest probability. The tile probabilities are then averaged to produce the final  
543 slide probability.

544 A heat map for each slide in the test set can be generated according to the  
545 “Of\_HeatMap\_nClasses.py” script in (<https://github.com/ncoudray/DeepPATH.git>). The heat map  
546 overlaps the probability information for each tile with the initial H&E slide to produce a color-  
547 coded image visualizing the localization of the mutation as predicted by the network at the tile  
548 level. The color intensity is analogous to the probability value of the tile to belong in each class.

549

### 550 *VGG16 and ResNet18*

551 These architectures were trained using the code available at  
552 <https://github.com/sedab/PathCNN>. They were trained for 50 training epochs, using learning  
553 rate of 0.1 for VGG16 and 0.05 for ResNet18. Image tiles are automatically resized from  
554 299x299 to the default tile size for these architectures which is 224x224 pixels. The SGD  
555 optimizer is used. Dropout was set at 0.1 and the Xavier initialization was employed. Data  
556 augmentation included random horizontal image flip, random image rotation and random color  
557 normalization, as defined in the “train.py” script of the pipeline. A leaky non-linear function was  
558 used. Network performance was measured by the AUC on the validation set. The best  
559 checkpoint was chosen the same way as for the Inception v3 architecture above.

560

### 561 *Hardware*

562 All deep learning models were trained on Tesla V100-SXM2-16G GPUs.

563

### 564 *Automated tumor selection classifiers - TumorNet*

565 Inception v3 was trained from scratch on the tiles generated as described under “Image  
566 preprocessing, Tumor annotation network” on 4 GPUs. Learning rate was set to 0.1 and batch  
567 size to 400, for all magnifications. Softmax was used as the activation function for the output

568 layer. Training loss and validation AUC were monitored the same way as for the BRAF mutation  
569 classifiers and performance is measured on the independent test set for the best model.

570

571 *BRAF mutation prediction on the automatically selected tumor areas for the sequential model*

572 To be able to use a sequential model with automatic tumor annotation we wanted to  
573 show that a BRAF prediction classifier trained on automatically selected tumor regions will  
574 achieve similar AUC as the one trained on the manually selected ones. We passed all 256  
575 slides through the TumorNet20x network to annotate the tumor regions. We then split the  
576 selected tumor tiles (tumor probability  $\geq 0.365789$ ) into training, validation and test sets.  
577 Inception v3 was trained on the tiles that are considered as tumor, using transfer training on the  
578 best TumorNet checkpoint at 20x magnification with the same parameters as for the manually  
579 annotated tumor regions.

580

581 *Statistical analysis*

582 After training and choosing the best performing model on the validation set, model  
583 performance was evaluated using the independent test set, which is comprised of a held-out  
584 population of tiles coming from 36 slides. Each slide comes from a unique patient in the case of  
585 our BRAF prediction classifiers. Regarding the tumor annotation classifiers, where each patient  
586 can have multiple slides, we report the “per patient” AUC. The probabilities for each slide were  
587 aggregated by the average of probabilities of the corresponding tiles. Receiver Operative  
588 Characteristic (ROC) curves and the corresponding Area Under the Curve (AUC) were  
589 generated as a measure of accuracy. Heat maps allowed visualization of probability differences  
590 and regions of interest.

591

592 *Conventional Machine Learning Models for Pathomics*

593 The multivariate logistic regression model was built using the *glm* function in R from the  
594 “ROCR” package. The Random Forest model was created using the *randomForest* function  
595 from the “randomForest” package in R.

596

597 *Smoothed training loss and validation AUC plots*

598 Smoothing was performed using the function *geom\_smooth()* from the *ggplot2* package with  
599 default parameters based on the number of data points, in R.

600

601 *Receiver Operating Characteristic Curves*

602 ROC curves were generated using the *pROC* package in R.

603

604 *Immunohistochemical analysis of mutated BRAF V600E*

605 Immunohistochemistry (IHC) was performed on 10% neutral buffered FFPE, 4- $\mu$ m  
606 human archival melanoma sample sections collected on plus slides (Fisher Scientific, Cat# 22-  
607 042-924) and stored at room temperature. Unconjugated, mouse anti-human Serine-Threonine-  
608 Protein Kinase B-raf (BRAF) V600E, clone VE1 (Abcam Cat# ab228461, Lot# GR32335840-6)  
609 raised against a synthetic peptide within human BRAF (amino acids 550-650) containing the  
610 glutamic acid substitution, was used for IHC<sup>43, 44</sup>. BRAF antibody was optimized on known  
611 positive and negative colon samples and subsequently validated on a mixed set 20 known  
612 positive/negative samples. Chromogenic immunohistochemistry was performed on a Ventana  
613 Medical Systems Discovery Ultra using Ventana’s reagents and detection kits unless otherwise  
614 noted. In brief, slides were deparaffinized online and antigen retrieved for 24 minutes at 95°C  
615 using Cell Conditioner 1 (Tris-Borate-EDTA pH8.5). BRAF was diluted 1:50 in Ventana  
616 antibody diluent (Ventana Medical Systems, Cat# 251-018) and incubated for 16 minutes at  
617 36°C. Endogenous peroxidase activity was post-primary blocked with 3% hydrogen peroxide for  
618 4 minutes. Primary antibody was detected using Optiview linker followed by multimer-HRP

619 incubated for 8 minutes each, respectively. The complex was visualized with 3,3  
620 diaminobenzidine for 8 minutes and enhanced with copper sulfate for 4 minutes. Slides were  
621 counterstained online with hematoxylin for 8 minutes and blued for 4 minutes. Slides were  
622 washed in distilled water, dehydrated and mounted with permanent media. Positive and  
623 negative (diluent only) controls were run in parallel with study sections. Blinded analysis of  
624 staining was performed by a single dermatopathologist (GJ).

625

626 *BRAF V600E-predicted tumor areas overlap with immunohistochemical V600E antibody*  
627 *staining.*

628 Manual annotation of V600E-stained areas on the IHC slides was performed using the  
629 Aperio ImageScope software. The same area was annotated on the H&E slide by visual overlap  
630 of the slides by a single certified dermatopathologist (GJ). Different tumor slices are used for  
631 IHC and H&E and most available alignment software are not allowing for image rotation which  
632 would account for a more faithful image alignment. Consequently, they were deemed unreliable  
633 to overlap the stained regions with the tumor area of the H&E slide. Manual annotation is more  
634 reliable in this case. After obtaining the desired masks, the probability distributions for tiles  
635 assigned to the V600E-stained areas as opposed to the probabilities of the remaining tumor  
636 tiles were plotted in the form of a boxplot for all 17 BRAF V600E slides. P-values were  
637 calculated using an unpaired two-sided Wilcoxon rank sum test for each slide.

638

639 *Generating saliency maps*

640 Saliency maps were created with the Smooth Integrated Gradients method<sup>45</sup>. First, an  
641 InceptionV3-architected graph was constructed using Tensorflow slim API in order to reload  
642 the trained model. The architecture and all hyperparameters were kept exactly the same as the  
643 trained model. Then, selected tiles from the independent test set and the TCGA cohort with the  
644 highest and the lowest predicted probabilities were fed into the reloaded models. The weights of

645 the layer before the last fully connected layer were then used to build the saliency map. We  
646 used the Saliency package (<https://pypi.org/project/saliency/>) from PyPI to generate Smoothed  
647 Integrated Gradients for these tiles. Considering the nature of the digital histopathology images,  
648 both pure black (RGB=[0,0,0]) and pure white (RGB=[255,255,255]) were used as the baselines  
649 to calculate the gradients. Saliency maps using the white background are presented in **Figure**  
650 **6**. A better visualization output was made by overlaying saliency maps onto the original tiles.

651

### 652 *Pathomics Analysis using CellProfiler*

653 To perform Pathomics analysis we used CellProfiler<sup>24</sup>, a publicly available software  
654 platform for cell and nuclear analysis from multiple formats of biological images. We developed  
655 a pipeline on CellProfiler version 3.1.8 to measure nuclear and cellular features on the tile level  
656 of H&E slides. CellProfiler 3 documentation is available here [http://cellprofiler-](http://cellprofiler-manual.s3.amazonaws.com/CellProfiler-3.0.0/index.html)  
657 [manual.s3.amazonaws.com/CellProfiler-3.0.0/index.html](http://cellprofiler-manual.s3.amazonaws.com/CellProfiler-3.0.0/index.html) for a detailed description of all pipeline  
658 steps that follows.

659

### 660 *Pipeline steps for nuclear annotation*

661 *UnmixColors*: The pipeline starts by de-convolving the Hematoxylin, Eosin and Pigment  
662 signals and generating grayscale images indicating the location of each stain with white color.  
663 The deconvolution of Hematoxylin and Eosin is built-in the software and the pigment color was  
664 determined by choosing a custom color profile based on the pigmentation of our images.

665 *IdentifyPrimaryObjects*: Then, the Hematoxylin stain is used to annotate nuclei, and the  
666 pigment stain is used to annotate pigmented regions on the tile. To annotate nuclei, we decided  
667 to adopt the Otsu method with default parameters except for “threshold correction factor” for  
668 which we used value of 1.3 instead of the default 1.0 for more stringent annotation. “Typical  
669 diameter of objects” was set to 10 to 40 pixels, as by default. For pigment annotation, we used a

670 manual thresholding method with a threshold of 0.8 and ‘typical diameter of objects’ was set to  
671 10 to 100 to reduce the number of objects identified. Our slides were not color normalized. We  
672 noticed that color normalization was interfering with the annotation of pigmented regions  
673 because it was reducing the contrast between the pigment color and the rest of the slide.  
674 Instead, we opted for the Otsu method which tests multiple thresholding values before  
675 performing nuclear annotation, therefore it automatically adapts to each tile’s color profile. For  
676 cell annotation, we changed the annotation method to Minimum Cross Entropy with the default  
677 thresholding smoothing value of 1.3488 and the default threshold correction factor of 1.0. The  
678 rest of pipeline stages are unchanged.

679 *ConvertObjectsToImage*: This step is used to convert the identified pigment objects to a  
680 mask image that can be used by the following step *MaskObjects*.

681 *MaskObjects*: Pigmented areas were excluded from our nuclear annotation because  
682 pigmented cells may represent melanophages rather than tumor cells.

683 *OverlayOutlines*: This step is overlaying the tile image with the identified nuclei and  
684 pigmented regions for visualization and evaluation of our pipeline. The objects are overlaid  
685 using the default parameters.

686 *SaveImages*: The overlay images of can be saved in a jpeg format.

687 *MeasureObjectSizeShape*: This module measures object size and shape features. In  
688 total, it measures 18 features:

689 *Export ToSpeadsheet*: This step is used to save the outputs of the previous step into a  
690 text file for every slide.

691 Our code is available on github: [https://github.com/sofnom/HistoPathNCA\\_pipeline](https://github.com/sofnom/HistoPathNCA_pipeline).

692

### 693 *Processing of CellProfiler results*

694 The CellProfiler pipeline generates data for each tile of all slides of a patient. All  
695 identified cells and nuclei per patient were collected and the nuclear and cellular features were



696 averaged by patient. Additional normalization to the total number of tiles by patient was needed  
697 for the total number of objects, total object area and total pigmented area. The distribution of  
698 each feature was plotted for both the non-tumor and the tumor tiles, stratified by the true label of  
699 the patient. Logarithmic conversion was used for plotting the total object and pigment areas. P-  
700 values for the boxplots were calculated using an unpaired two-sided Wilcoxon rank sum test in  
701 R.

702

### 703 *Down-sampled training of Inception v3*

704 The NYU dataset was down-sampled to 20, 40, 60 and 80% of the available slides. We  
705 made sure to maintain the same proportion of BRAF mutant to BRAF WT slides in the down-  
706 sampled datasets as for the network trained on the initial dataset to avoid biasing the training  
707 process and our results (**Supplemental Table 4**). Transfer training at 20x magnification was  
708 performed using the TumorNet weights. Learning rate was set to 0.1 and batch size to 160. All  
709 other training parameters were the same as the network trained on the whole dataset. The  
710 average AUC on the validation and test sets was calculated for the best checkpoints along with  
711 the average CIs. The data were imported in Microsoft Excel. Using the built-in “Power” function  
712 we fit an inverse power law curve to the data to predict the number of available tiles we would  
713 need to achieve a BRAF mutation prediction AUC of 80% and 90%; performance which is much  
714 more relevant for clinical practice.

715

716 **Supplementary Materials**

717 **Fig S1.** Training of tumor annotation classifier at multiple magnifications.

718 **Table S1.** Training Tumor Annotation Network for different magnifications.

719 **Table S2.** Training multiple architectures for BRAF mutation prediction.

720 **Fig S2.** Different learning modes affect *BRAF* mutation prediction (Inception v3; 20x  
721 magnification).

722 **Fig S3.** Different learning modes affect *BRAF* mutation prediction (Inception v3; 10x  
723 magnification).

724 **Fig S4.** Different learning modes affect *BRAF* mutation prediction (Inception v3; 5x  
725 magnification).

726 **Table S3.** Different learning modes affect *BRAF* mutation prediction (Inception v3).

727 **Table S4.** Down-sampled datasets for Inception v3 training.

728 **Fig S5.** Dataset down-sampling reduces classifier's performance.

729 **Fig S6.** BRAF mutation prediction using manual vs. network annotated tumor areas.

730 **Fig S7.** Nuclear features for NYU cohort.

731 **Fig S8.** Nuclear features for TCGA cohort.

732 **Fig S9.** Cellular features for NYU cohort.

733 **Fig S10.** Cellular features for TCGA cohort.

734 **Table S5.** Pathomics machine learning models for BRAF mutation prediction using nuclear  
735 features.

736

737 **References:**

- 738 1. Ascierto PA, *et al.* The role of BRAF V600 mutation in melanoma. *J Transl Med* **10**, 85  
739 (2012).
- 740 2. Sun J, Zager JS, Eroglu Z. Encorafenib/binimetinib for the treatment of BRAF-mutant  
741 advanced, unresectable, or metastatic melanoma: design, development, and potential  
742 place in therapy. *Onco Targets Ther* **11**, 9081-9089 (2018).
- 743 3. Luke JJ, Flaherty KT, Ribas A, Long GV. Targeted agents and immunotherapies:  
744 optimizing outcomes in melanoma. *Nat Rev Clin Oncol* **14**, 463-482 (2017).
- 745 4. Cheng L, Lopez-Beltran A, Massari F, MacLennan GT, Montironi R. Molecular testing for  
746 BRAF mutations to inform melanoma treatment decisions: a move toward precision  
747 medicine. *Mod Pathol* **31**, 24-38 (2018).
- 748 5. Barel F, Guibourg B, Lambros L, Le Flahec G, Marcorelles P, Uguen A. Evaluation of a  
749 Rapid, Fully Automated Platform for Detection of BRAF and NRAS Mutations in  
750 Melanoma. *Acta Derm Venereol* **98**, 44-49 (2018).
- 751 6. Bisschop C, *et al.* Rapid BRAF mutation tests in patients with advanced melanoma:  
752 comparison of immunohistochemistry, Droplet Digital PCR, and the Idylla Mutation  
753 Platform. *Melanoma Res* **28**, 96-104 (2018).
- 754 7. Colomba E, *et al.* Detection of BRAF p.V600E mutations in melanomas: comparison of  
755 four methods argues for sequential use of immunohistochemistry and pyrosequencing. *J*  
756 *Mol Diagn* **15**, 94-100 (2013).
- 757 8. Ninatti G, Kirienko M, Neri E, Sollini M, Chiti A. Imaging-Based Prediction of Molecular  
758 Therapy Targets in NSCLC by Radiogenomics and AI Approaches: A Systematic  
759 Review. *Diagnostics (Basel)* **10**, (2020).
- 760 9. Banna GL, *et al.* The Promise of Digital Biopsy for the Prediction of Tumor Molecular  
761 Features and Clinical Outcomes Associated With Immunotherapy. *Front Med*  
762 *(Lausanne)* **6**, 172 (2019).
- 763 10. Saltz J, *et al.* Towards Generation, Management, and Exploration of Combined  
764 Radiomics and Pathomics Datasets for Cancer Research. *AMIA Jt Summits Transl Sci*  
765 *Proc* **2017**, 85-94 (2017).
- 766 11. Tran WT, *et al.* Personalized Breast Cancer Treatments Using Artificial Intelligence in  
767 Radiomics and Pathomics. *J Med Imaging Radiat Sci* **50**, S32-S41 (2019).
- 768 12. Hou L, *et al.* Automatic histopathology image analysis with CNNs. In: *2016 New York*  
769 *Scientific Data Summit (NYSDS)* (ed<sup>^</sup>(eds) (2016).
- 770 13. Coudray N, *et al.* Classification and mutation prediction from non-small cell lung cancer  
771 histopathology images using deep learning. *Nat Med* **24**, 1559-1567 (2018).
- 772 14. Couture HD, *et al.* Image analysis with deep learning to predict breast cancer grade, ER  
773 status, histologic subtype, and intrinsic subtype. *NPJ Breast Cancer* **4**, 30 (2018).
- 774  
775  
776  
777  
778  
779  
780  
781  
782  
783  
784  
785  
786

- 787  
788 15. Tsou P, Wu CJ. Mapping Driver Mutations to Histopathological Subtypes in Papillary  
789 Thyroid Carcinoma: Applying a Deep Convolutional Neural Network. *J Clin Med* **8**,  
790 (2019).  
791  
792 16. Kather JN, *et al.* Pan-cancer image-based detection of clinically actionable genetic  
793 alterations. *Nature Cancer*, (2020).  
794  
795 17. Fu Y, *et al.* Pan-cancer computational histopathology reveals mutations, tumor  
796 composition and prognosis. *Nature Cancer*, (2020).  
797  
798 18. Cancer Genome Atlas N. Genomic Classification of Cutaneous Melanoma. *Cell* **161**,  
799 1681-1696 (2015).  
800  
801 19. Wang Z, Jensen MA, Zenklusen JC. A Practical Guide to The Cancer Genome Atlas  
802 (TCGA). *Methods Mol Biol* **1418**, 111-141 (2016).  
803  
804 20. Simonyan K, Zisserman A. Very Deep Convolutional Networks for Large-Scale Image  
805 Recognition. *arXiv 14091556*, (2014).  
806  
807 21. He K, Zhang X, Ren S, Sun J. Deep Residual Learning for Image Recognition. In: *2016*  
808 *IEEE Conference on Computer Vision and Pattern Recognition (CVPR)* (ed<sup>^</sup>(eds)  
809 (2016).  
810  
811 22. Russakovsky O, *et al.* ImageNet Large Scale Visual Recognition Challenge.  
812 *International Journal of Computer Vision* **115**, 211-252 (2015).  
813  
814 23. Capper D, *et al.* Assessment of BRAF V600E mutation status by immunohistochemistry  
815 with a mutation-specific monoclonal antibody. *Acta Neuropathol* **122**, 11-19 (2011).  
816  
817 24. Carpenter AE, *et al.* CellProfiler: image analysis software for identifying and quantifying  
818 cell phenotypes. *Genome Biol* **7**, R100 (2006).  
819  
820 25. Kwon MR, Shin JH, Park H, Cho H, Hahn SY, Park KW. Radiomics Study of Thyroid  
821 Ultrasound for Predicting BRAF Mutation in Papillary Thyroid Carcinoma: Preliminary  
822 Results. *AJNR Am J Neuroradiol* **41**, 700-705 (2020).  
823  
824 26. Yoon JH, *et al.* Radiomics in predicting mutation status for thyroid cancer: A preliminary  
825 study using radiomics features for predicting BRAFV600E mutations in papillary thyroid  
826 carcinoma. *PLoS One* **15**, e0228968 (2020).  
827  
828 27. Shofty B, *et al.* Virtual biopsy using MRI radiomics for prediction of BRAF status in  
829 melanoma brain metastasis. *Sci Rep* **10**, 6623 (2020).  
830  
831 28. Esteva A, *et al.* Dermatologist-level classification of skin cancer with deep neural  
832 networks. *Nature* **542**, 115-118 (2017).  
833  
834 29. Haenssle HA, *et al.* Man against machine: diagnostic performance of a deep learning  
835 convolutional neural network for dermoscopic melanoma recognition in comparison to 58  
836 dermatologists. *Ann Oncol* **29**, 1836-1842 (2018).  
837

- 838 30. Armengot-Carbo M, Nagore E, Garcia-Casado Z, Botella-Estrada R. The association  
839 between dermoscopic features and BRAF mutational status in cutaneous melanoma:  
840 significance of the blue-white veil. *J Am Acad Dermatol*, (2018).  
841
- 842 31. Colombino M, *et al.* Dermoscopy and confocal microscopy for metachronous multiple  
843 melanomas: morphological, clinical, and molecular correlations. *Eur J Dermatol* **28**, 149-  
844 156 (2018).  
845
- 846 32. Viros A, *et al.* Improving melanoma classification by integrating genetic and morphologic  
847 features. *PLoS Med* **5**, e120 (2008).  
848
- 849 33. Broekaert SM, *et al.* Genetic and morphologic features for melanoma classification.  
850 *Pigment Cell Melanoma Res* **23**, 763-770 (2010).  
851
- 852 34. Gecer B, Aksoy S, Mercan E, Shapiro LG, Weaver DL, Elmore JG. Detection and  
853 classification of cancer in whole slide breast histopathology images using deep  
854 convolutional networks. *Pattern Recognit* **84**, 345-356 (2018).  
855
- 856 35. Evans AJ, *et al.* US Food and Drug Administration Approval of Whole Slide Imaging for  
857 Primary Diagnosis: A Key Milestone Is Reached and New Questions Are Raised. *Arch*  
858 *Pathol Lab Med*, (2018).  
859
- 860 36. Peng Y, *et al.* Combining texture features of whole slide images improves prognostic  
861 prediction of recurrence-free survival for cutaneous melanoma patients. *World J Surg*  
862 *Oncol* **18**, 130 (2020).  
863
- 864 37. Ziemys A, *et al.* Integration of Digital Pathologic and Transcriptomic Analyses Connects  
865 Tumor-Infiltrating Lymphocyte Spatial Density With Clinical Response to BRAF  
866 Inhibitors. *Front Oncol* **10**, 757 (2020).  
867
- 868 38. McGarry SD, *et al.* Radio-pathomic Maps of Epithelium and Lumen Density Predict the  
869 Location of High-Grade Prostate Cancer. *Int J Radiat Oncol Biol Phys* **101**, 1179-1187  
870 (2018).  
871
- 872 39. Pranjal V, *et al.* RaPtomics: integrating radiomic and pathomic features for predicting  
873 recurrence in early stage lung cancer. In: *Proc.SPIE* (ed<sup>^</sup>(eds) (2018).  
874
- 875 40. Yu KH, *et al.* Predicting non-small cell lung cancer prognosis by fully automated  
876 microscopic pathology image features. *Nat Commun* **7**, 12474 (2016).  
877
- 878 41. Mobadersany P, *et al.* Predicting cancer outcomes from histology and genomics using  
879 convolutional networks. *Proc Natl Acad Sci U S A* **115**, E2970-E2979 (2018).  
880
- 881 42. Wich LG, *et al.* Developing a multidisciplinary prospective melanoma biospecimen  
882 repository to advance translational research. *Am J Transl Res* **1**, 35-43 (2009).  
883
- 884 43. Nielsen LB, Dabrosin N, Sloth K, Bonnelykke-Behrndtz ML, Steiniche T, Lade-Keller J.  
885 Concordance in BRAF V600E status over time in malignant melanoma and  
886 corresponding metastases. *Histopathology* **72**, 814-825 (2018).  
887

- 888 44. Piris A, Mihm MC, Jr., Hoang MP. BAP1 and BRAFV600E expression in benign and  
889 malignant melanocytic proliferations. *Hum Pathol* **46**, 239-245 (2015).  
890  
891 45. Smilkov D, Thorat N, Kim B, ViÈgas F, Wattenberg M. SmoothGrad: removing noise by  
892 adding noise. *ArXiv* **abs/1706.03825**, (2017).  
893  
894  
895

896 **Acknowledgments:** We thank Luis Chiriboga from the NYU Experimental Pathology  
897 Immunohistochemistry Core Laboratory. The results shown here are in part based upon data  
898 generated by the TCGA Research Network: <https://www.cancer.gov/tcga>. This work has used  
899 computing resources at the High-Performance Computing Facility at the NYU Medical Center.  
900 We also want to thank Anna Yeaton for discussions about this project. **Funding:** This research  
901 was supported, in part, by the NYU School of Medicine Orbuch-Brand Pilot Grant Program for  
902 Cancers of the Skin; by the Laura and Isaac Perlmutter Cancer Center Support Grant; NIH/NCI  
903 P30CA016087; NYU Melanoma SPORE P50CA225450; and by the National Institutes of Health  
904 S10 Grants; NIH/ORIP S10OD01058 and S10OD018338. AT is supported by the American  
905 Cancer Society (RSG-15-189-01-RMC). SN is supported by the Onassis Foundation -  
906 Scholarship ID: F ZP 036-1/2019-2020. DF is supported by the grant U24CA210972. **Author**  
907 **contributions:** Study concept and design: RHK, SN, IO, AT. Acquisition of data: RHK, SN, ZD,  
908 GJ, UM, RLS, RSB. Analysis and interpretation of data: RHK, SN, NC, GJ, JSW, NR, IO, AT,  
909 RH, EE; IA and DF offered constructive feedback and suggestions. Study supervision: NC, IO,  
910 AT. **Competing interests:** AT is a scientific advisor to Intelligencia.AI. All other authors  
911 declare that they have no competing interests.

912
